# Supplementary material
Source: bioRxiv or medRxiv preprint supplement (https://www.biorxiv.org/highwire/filestream/121438/field_highwire_adjunct_files/1/401372-2.pdf)

Supplemental Figure 2)

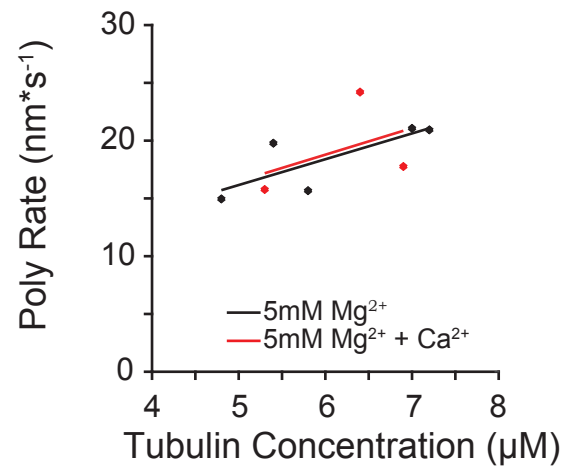

Supplement: Supplementary file [file 401372-2.pdf]
